# Supplementary material
Source: PubMed Central journal article supplement (PMC4010168)
Supplement: Supp_Fig1.pdf [file Supp_Fig1.pdf]

## Supplementary Data

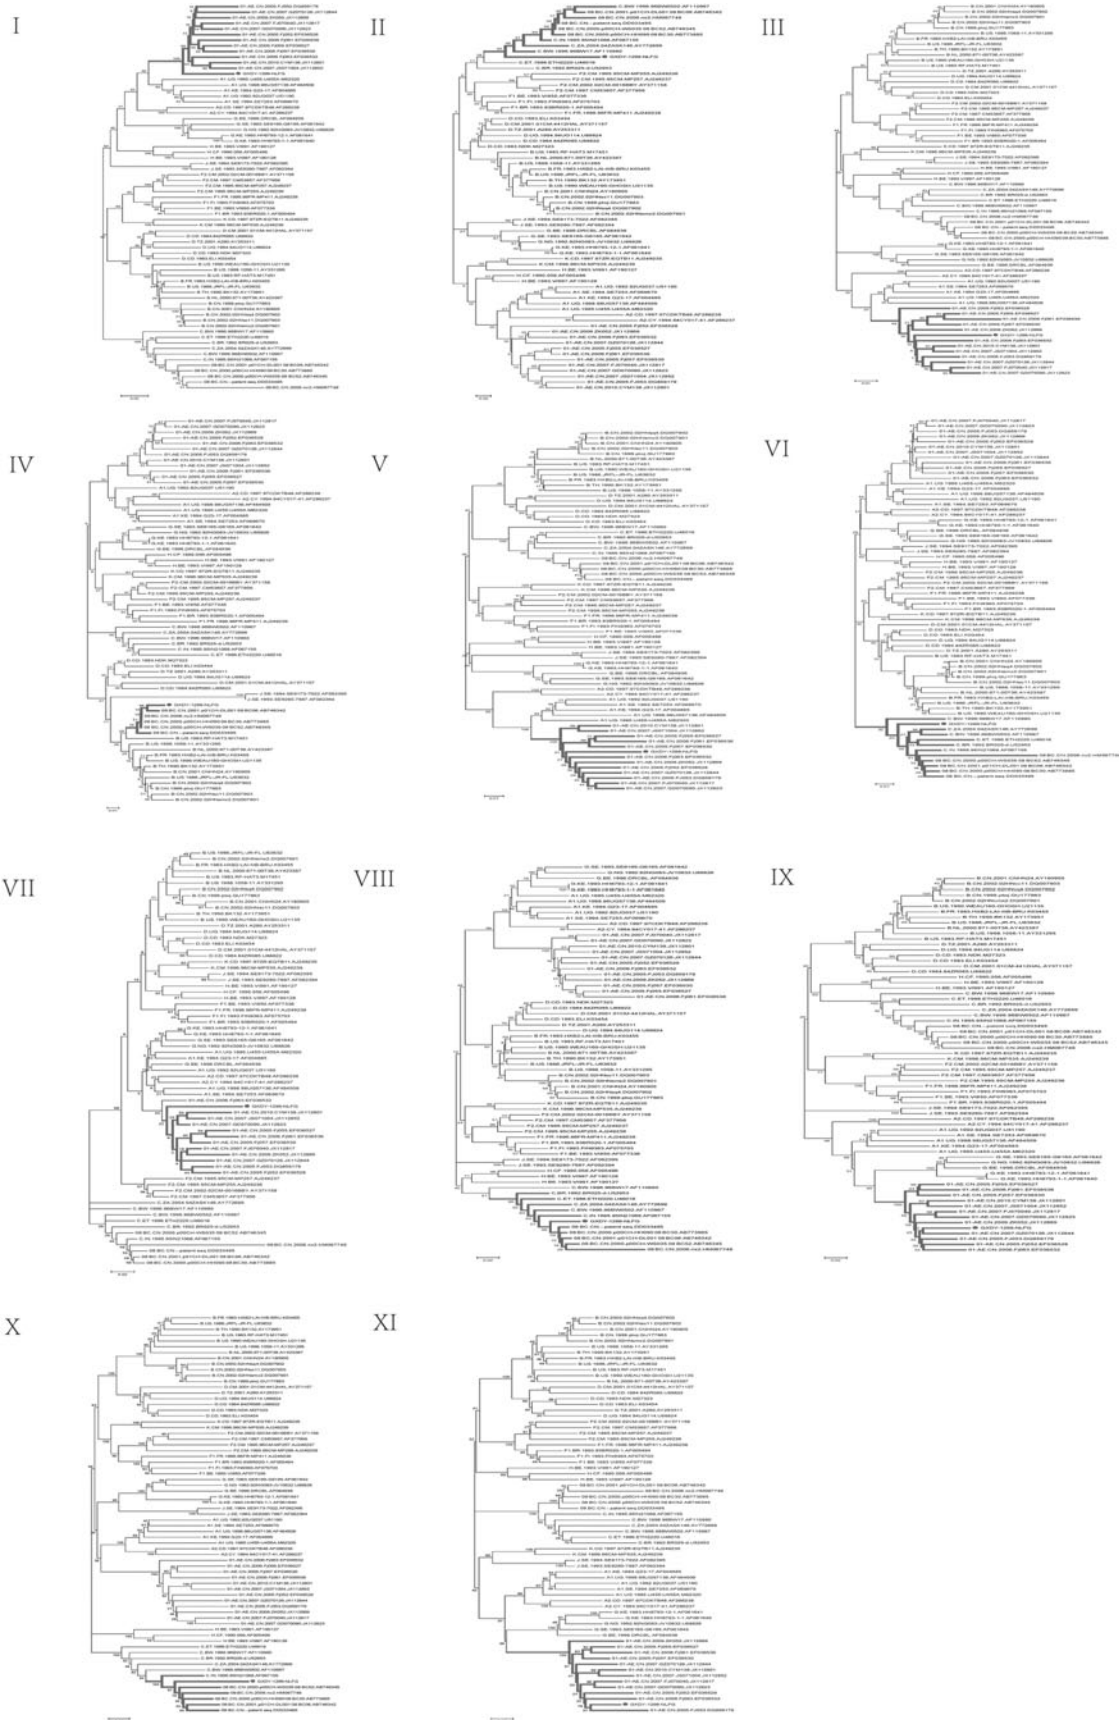

**SUPPLEMENTARY FIG. S1.** Phylogenetic analyses of 11 mosaic segments. The phylogenetic trees of the 11 mosaic segments were constructed with MEGA 5.0 using the neighbor-joining method with 1,000 replications. The subtype references are derived from the Los Alamos HIV Sequence Database. The clade including GXDY1299 is marked in red and is in bold.
